# Supplementary material for: Arbuscular Mycorrhizal Fungi Increase Nutritional Quality of Soilless Grown Lettuce while Overcoming Low Phosphorus Supply
Source: MDPI journal article supplement (doi:10.3390/foods11223612), 2022-11-12
Supplement: s1 [file s1]

**Table S1.** Gas exchange parameters; net photosynthetic rate (Pn), stomatal conductance (gs), intercellular CO<sub>2</sub> concentration (Ci), transpiration rate (E) and intrinsic water user efficiency (WUEi; Pn/gs) measured in lettuce leaves during the experiment (1<sup>st</sup> measurement and 2<sup>nd</sup> measurement respectively 35 DAT and 53 DAT) LPC = Low Phosphorus Control; HPC = High Phosphorus Control; LPM = Low Phosphorus Mycorrhizal.

| Sampling time<br>(DAT)                                                                             | Treatment | Pn<br>( $\mu\text{mol CO}_2 \text{ m}^{-2} \text{ s}^{-1}$ ) | gs<br>( $\text{mmol m}^{-2} \text{ s}^{-1}$ ) | Ci<br>( $\mu\text{mol mol}^{-1}$ ) | E<br>( $\text{mol H}_2\text{O m}^{-2} \text{ s}^{-1}$ ) | WUEi<br>( $\mu\text{mol CO}_2 \text{ mol}^{-1} \text{ H}_2\text{O}$ ) |
|----------------------------------------------------------------------------------------------------|-----------|--------------------------------------------------------------|-----------------------------------------------|------------------------------------|---------------------------------------------------------|-----------------------------------------------------------------------|
| 35 DAT                                                                                             | LPC       | 4.40 $\pm$ 0.26                                              | 66.60 $\pm$ 9.21                              | 250.60 $\pm$ 13.78                 | 1.32 $\pm$ 0.15                                         | 71.41 $\pm$ 10.76                                                     |
| 35 DAT                                                                                             | HPC       | 5.70 $\pm$ 0.41                                              | 85.00 $\pm$ 8.41                              | 263.20 $\pm$ 12.26                 | 1.56 $\pm$ 0.13                                         | 69.08 $\pm$ 6.31                                                      |
| 35 DAT                                                                                             | LPM       | 5.92 $\pm$ 0.46                                              | 136.60 $\pm$ 11.52                            | 312.40 $\pm$ 9.18                  | 2.46 $\pm$ 0.11                                         | 43.56 $\pm$ 1.43                                                      |
| 53 DAT                                                                                             | LPC       | 4.84 $\pm$ 0.16                                              | 105.00 $\pm$ 7.40                             | 278.43 $\pm$ 14.72                 | 1.64 $\pm$ 0.11                                         | 46.78 $\pm$ 1.82                                                      |
| 53 DAT                                                                                             | HPC       | 5.78 $\pm$ 0.24                                              | 133.40 $\pm$ 8.12                             | 296.35 $\pm$ 12.44                 | 2.00 $\pm$ 0.04                                         | 44.20 $\pm$ 3.87                                                      |
| 53 DAT                                                                                             | LPM       | 6.58 $\pm$ 0.20                                              | 155.60 $\pm$ 13.21                            | 370.80 $\pm$ 12.74                 | 2.64 $\pm$ 0.11                                         | 43.31 $\pm$ 3.13                                                      |
| MAIN EFFECT                                                                                        |           |                                                              |                                               |                                    |                                                         |                                                                       |
| 35 DAT                                                                                             |           | 5.34 $\pm$ 0.27 a                                            | 96.07 $\pm$ 9.50 b                            | 275.40 $\pm$ 9.55 a                | 1.78 $\pm$ 0.15 b                                       | 61.35 $\pm$ 5.14 a                                                    |
| 53 DAT                                                                                             |           | 5.74 $\pm$ 0.22 a                                            | 131.33 $\pm$ 7.66 a                           | 274.07 $\pm$ 9.25 a                | 2.09 $\pm$ 0.12 a                                       | 44.77 $\pm$ 1.68 b                                                    |
|                                                                                                    | LPC       | 4.63 $\pm$ 0.16 b                                            | 85.80 $\pm$ 8.48 b                            | 249.60 $\pm$ 8.98 b                | 1.48 $\pm$ 0.10 c                                       | 59.09 $\pm$ 6.58 a                                                    |
|                                                                                                    | HPC       | 5.74 $\pm$ 0.23 a                                            | 109.20 $\pm$ 10.30 b                          | 263.90 $\pm$ 8.23 b                | 1.78 $\pm$ 0.10 b                                       | 56.64 $\pm$ 5.71 a                                                    |
|                                                                                                    | LPM       | 6.25 $\pm$ 0.28 a                                            | 146.10 $\pm$ 9.33 a                           | 310.70 $\pm$ 7.00 a                | 2.55 $\pm$ 0.08 a                                       | 43.44 $\pm$ 1.71 b                                                    |
| ANOVA (ns, not significant; *, significant at 5%; **, significant at 1%; ***, significant at 0.1%) |           |                                                              |                                               |                                    |                                                         |                                                                       |
| Time                                                                                               |           | ***                                                          | ***                                           | ***                                | ns                                                      | ***                                                                   |
| Treatment                                                                                          |           | ***                                                          | ***                                           | ***                                | **                                                      | ***                                                                   |
| Interaction                                                                                        |           | ns                                                           | ns                                            | ns                                 | ns                                                      | ns                                                                    |

Mean values (n = 4)  $\pm$  SE followed by different letters are not statistically different (P < 0.05) according to the LSD test.
